# Supplementary material for: Wet and dry seasons modulate coastal coccolithophore dynamics off South-western Nigeria (Gulf of Guinea)
Source: Copernicus journal article supplement (doi:10.5194/egusphere-2025-3201), 2025-08-11
Supplement: Supplementary file 1 [file egusphere-2025-3201-supplement.zip]

## Sheet: Captions
Title:	Wet and dry seasons modulate coastal coccolithophore dynamics off South-western Nigeria (Gulf of Guinea)
Authors:	Falilu Adekunbi1,2,3
	Michaël Grelaud3*
	Gerald Langer3
	Lucian Chukwu1
	Marta Alvarez4
	Shakirudeen Odunuga5
	Kai Schulz6
	Patrizia Ziveri3, 7, 8
Affiliation:	1 Department of Marine Sciences, Faculty of Science, University of Lagos (UNILAG), Lagos, Nigeria
	2 Nigerian Institute for Oceanography and Marine Research, (NIOMR) Lagos, Nigeria
	3 Institut de Ciència i Tecnologia Ambientals (ICTA-UAB), Universitat Autònoma de Barcelona, Barcelona, Spain
	4 Instituto Español de Oceanografía (IEO-CSIC), A Coruña, Spain
	5 Department of Geography, Faculty of Social Sciences, University of Lagos (UNILAG), Lagos, Nigeria
	6Centre for Coastal Biogeochemistry, School of Environment Science and Engineering, Southern Cross University, Lismore, NSW 2480, Australia
	7Catalan Institution for Research and Advanced Studies (ICREA), Barcelona, Spain
	8 BABVE Dept. ,Universitat Autònoma de Barcelona, Barcelona, (ICTA-UAB), Spain
Corresponding author:	michael.grelaud@uab.cat
Supplementary tables:	Table S1: Taxonomic list of coccolithophores observed at the station BLA, LA and LBW during the investigated period (December 2018- April 2021).
	Table S2: Results of the Shapiro-Wilk normality tests for the environmental parameters and the coccolithophore community during both the dry and wet seasons. Bold p-values show normal distribution.
	Table S3: Results of the Welch’s two samples t-test, when normality was meet for the environmental parameter for both the dry and wet seasons.
	Table S4: Results of the Wilcoxon rank-sum test, when normality was not meet for the environmental parameters of the coccolithophore community for at least one season.
	Table S5: Results of the Spearman correlations for the whole dataset as well as for the dry and wet seasons. (*) p-value < 0.05; (**) p-value < 0.01; (***) p-value < 0.001
	Table S6: Coccolithophore standing stocks dataset
	Table S7: Environmental parameters dataset
	Table S8: Average coccolithophore standing stocks global coastal areas

## Sheet: TableS1
Taxon	Citation
Calciopappus rigidus	Gaarder & Ramsfjell (1954)
Calciosolenia corselii	Malinverno (2004)
Discosphaera tubifera	Murray & Blackman (1898), Ostenfeld (1900)
Emiliania huxleyi type A	Lohmann (1902), Young & Westbroek (1991)
Florisphaera profunda	Okada & Honjo (1973)
Gephyrocapsa ericsonii	McIntyre & Bé (1967)
Gephyrocapsa oceanica	Kamptner (1954)
Helicosphaera carteri	Wallich (1877)
Helicosphaera sp.	Kamptner (1954)
Michaelsarsia elegans	Gran (1912)
Syracosphaera histrica	Kamptner (1941)
Syracosphaera tumularis	Sánchez-Suárez (1990)
Syracosphaera sp.	Lohmann (1902)
Umbellosphaera tenuis type I	Kleijne (1993)
Umbilicosphaera hulburtiana	Gaarder (1970)

## Sheet: TableS2
	LBW					LA					BLA					All
	Dry		Wet		Normality (α=0.05)	Dry		Wet		Normality (α=0.05)	Dry		Wet		Normality (α=0.05)	Dry		Wet		Normality (α=0.05)
Parameter	W	p-value	W	p-value		W	p-value	W	p-value		W	p-value	W	p-value		W	p-value	W	p-value
Temperature	0.79904	0.009136	0.79996	0.0286	No	0.94027	0.3215	0.95222	0.6724	Yes	0.95021	0.4599	0.90509	0.1139	Yes	0.95719	0.1644	0.93979	0.06076	Yes
Salinity	0.77583	0.004527	0.70126	0.002328	No	0.9649	0.7245	0.93655	0.4809	Yes	0.81319	0.003095	0.86326	0.0269	No	0.95778	0.1717	0.93639	0.04817	No
DIC	0.93926	0.5118	0.93905	0.6018	Yes	0.91538	0.1233	0.92522	0.3646	Yes	0.95296	0.5723	0.97473	0.9436	Yes	0.96721	0.338	0.98831	0.9691	Yes
Total Alkalinity	0.78654	0.006257	0.76442	0.01178	No	0.96488	0.7242	0.94841	0.6237	Yes	0.92799	0.2546	0.96246	0.7912	Yes	0.94595	0.07148	0.93397	0.04087	No
pHT	0.90261	0.1989	0.95485	0.7599	Yes	0.90687	0.08858	0.91535	0.2818	Yes	0.95484	0.6037	0.88509	0.08362	Yes	0.95683	0.1601	0.93998	0.06155	Yes
pCO2	0.84311	0.03469	0.9126	0.3728	No	0.93102	0.2264	0.90377	0.2054	Yes	0.89634	0.08369	0.94002	0.4572	Yes	0.89255	0.001841	0.8581	0.0004269	No
HCO₃⁻	0.96267	0.8045	0.94091	0.62	Yes	0.945	0.3824	0.89518	0.1613	Yes	0.97456	0.919	0.9433	0.501	Yes	0.98116	0.7712	0.94747	0.1031	Yes
CO₃²⁻	0.83561	0.02766	0.85956	0.1189	No	0.98076	0.9637	0.92922	0.403	Yes	0.96307	0.7456	0.8644	0.04404	No	0.9795	0.7142	0.96764	0.3995	Yes
Ωcalcite	0.83493	0.0271	0.87657	0.1746	No	0.98595	0.9923	0.91545	0.2825	Yes	0.96634	0.8007	0.87138	0.05457	Yes	0.97909	0.7001	0.96284	0.2938	Yes
Ωaragonite	0.84014	0.03172	0.85989	0.1198	No	0.98421	0.9857	0.91784	0.301	Yes	0.96558	0.7881	0.8786	0.06826	Yes	0.98073	0.7565	0.9645	0.3273	Yes
Phosphate	0.81542	0.01501	0.94718	0.6827	No	0.56914	5.311e-06	0.69781	0.0004383	No	0.73413	0.0002894	0.50654	3.973e-06	No	0.70539	2.63e-07	0.54483	4.12e-09	No
Nitrate	0.96569	0.84	0.85998	0.12	Yes	0.81256	0.003032	0.89945	0.182	No	0.88295	0.03551	0.85156	0.01827	No	0.91102	0.006052	0.95362	0.1575	No
Nitrite	0.86828	0.07368	0.77067	0.01379	No	0.8785	0.03007	0.70721	0.0005792	No	0.56425	4.786e-06	0.53005	6.21e-06	No	0.68174	1.12e-07	0.5129	1.77e-09	No
Silicate	0.76019	0.002824	0.81878	0.0453	No	0.55061	3.594e-06	0.89772	0.1733	No	0.88556	0.03917	0.94303	0.422	No	0.46983	2.09e-10	0.83268	0.000118	No
Chlorophyll a	0.92482	0.3608	0.97636	0.9427	Yes	0.88356	0.03633	0.91702	0.2946	No	0.92643	0.1896	0.9465	0.4712	Yes	0.94931	0.09166	0.97024	0.468	Yes
Precipitations	0.86297	0.06292	0.82247	0.04953	No	0.8465	0.009489	0.78674	0.006296	No	0.81649	0.003445	0.75464	0.001019	No	0.87019	0.0004834	0.81255	4.52e-05	No
Total coccospheres	0.83285	0.02545	0.90221	0.3025	No	0.89099	0.04811	0.89799	0.1747	No	0.86652	0.01935	0.94283	0.4193	No	0.87369	0.0001584	0.92614	0.02418	No
E. huxleyi	0.9646	0.8367	0.93026	0.5185	Yes	0.84084	0.02835	0.8482	0.04043	No	0.8047	0.005709	0.92974	0.2705	No	0.7544	2.714e-07	0.86458	0.0006034	No
G. oceanica	0.72559	0.001001	0.84298	0.08082	No	0.83277	0.005921	0.86942	0.0762	No	0.87435	0.02578	0.72154	0.0004265	No	0.77863	8.322e-07	0.80673	3.467e-05	No
G. ericsonii	0.89107	0.3881	-	-	-	0.83425	0.06571	0.75	2.2e-16	No	0.78084	0.03925	0.87735	0.2975	No	0.45551	1.057e-11	0.48447	8.566e-10	No
C. rigidus	0.9464	0.6506	0.95649	0.7833	Yes	0.65965	0.0007813	0.84592	0.0866	No	0.74623	0.00321	0.91714	0.3691	No	0.6486	3.969e-09	0.77299	8.023e-06	No
U. hulburtiana	-	-	0.6565	0.003188	-	0.94369	0.5425	0.69589	0.001271	No	0.82082	0.1652	0.67813	0.0003382	No	0.35341	8.201e-13	0.6419	7.064e-08	No
S. histrica	-	-	-	-	-	-	-	-	-	-	-	-	-	-	-	–	-	0.23689	3.956e-12	-
H. carteri	-	-	-	-	-	0.64786	0.002383	-	-	-	0.84238	0.1716	-	-	-	0.23642	6.102e-14	0.32072	2.089e-11	No
D. tubifera	0.9891	0.8002	-	-	-	0.79031	0.08595	0.76413	0.04002	No	0.96769	0.8602	0.90637	0.4461	Yes	0.58627	4.804e-10	0.32931	2.496e-11	No
C. corselii	-	-	-	-	-	-	-	0.9639	0.8493	-	-	-	0.77172	0.04864	-	0.27441	1.372e-13	0.50736	1.531e-09	No
M. elegans	-	-	-	-	-	-	-	-	-	-	0.99997	0.9894	0.79406	0.07242	Yes	0.34525	6.771e-13	0.37667	6.88e-11	No
S. tumularis	0.87794	0.3299	0.75478	0.01058	No	0.5583	5.134e-05	0.47192	4.728e-06	No	0.84858	0.07189	0.76653	0.04204	No	0.63787	2.714e-09	0.35944	4.73e-11	No
Syracosphaera sp.	-	-	-	-	-	-	-	0.886	0.3422	-	-	-	0.96746	0.8257	-	0.36965	1.207e-12	0.49911	1.239e-09	No
Helicosphaera sp.	-	-	-	-	-	-	-	-	-	-	-	-	-	-	-	0.13525	8.065e-15	0.16474	1.045e-12	No
U. tenuis	-	-	-	-	-	-	-	-	-	-	-	-	-	-	-	–	-	0.16474	1.045e-12	No
F. profunda	-	-	-	-	-	-	-	-	-	-	-	-	-	-	-	–	-	0.2827	9.655e-12	-
Shannon index	0.90195	0.1953	0.97639	0.9429	Yes	0.81683	0.003484	0.91384	0.2706	No	0.83103	0.005583	0.90519	0.1143	No	0.84089	2.152e-05	0.94226	0.07201	No
Richness	0.95247	0.6756	0.93658	0.5777	Yes	0.89156	0.04917	0.95576	0.7179	No	0.95126	0.4768	0.89894	0.09168	Yes	0.93892	0.01964	0.94305	0.07603	No

## Sheet: TableS3
Station	Parameter	t-value	df	p-value	Significant (p < 0.05)
LBW	DIC	-0.23038	16.55	0.8206	No
	pHT	0.25485	15.787	0.8021	No
	HCO₃⁻	-0.24009	16.671	0.8132	No
	NO3	0.89206	16.94	0.3849	No
	Chlorophyll a	0.0097414	16.87	0.9923	No
	E. huxleyi	-3.9091	7.2593	0.005428	Yes
	C. rigidus	0.81911	11.998	0.4287	No
	Shannon index	-0.63252	16.591	0.5357	No
	Richness	-0.58053	13.513	0.5711	No
LA	Temperature	1.8907	13.505	0.08031	No
	Salinity	-2.8738	25.998	0.007978	Yes
	DIC	-1.0076	18.701	0.3265	No
	Total Alkalinity	-0.96923	24.564	0.3419	No
	pHT	0.80731	16.025	0.4313	No
	pCO2	-0.97695	15.443	0.3437	No
	HCO₃⁻	-0.99052	16.398	0.3363	No
	CO32	0.6381	16.905	0.532	No
	Ωcalcite	0.80275	16.297	0.4337	No
	Ωaragonite	0.78027	16.155	0.4465	No
BLA	Temperature	-1.016	23.365	0.32	No
	DIC	0.9743	25.911	0.3389	No
	Total Alkalinity	-0.63938	25.014	0.5284	No
	pHT	-2.1831	18.409	0.0422	Yes
	pCO2	2.3957	15.93	0.02923	Yes
	HCO₃⁻	1.684	25.504	0.1044	No
	Ωcalcite	-2.1848	21.654	0.04002	Yes
	Ωaragonite	-2.2234	21.83	0.03686	Yes
	Chlorophyll a	-0.86751	29.856	0.3926	No
	D. tubifera	0.18712	7.0524	0.8568	No
	M. elegans	-1.109	5.2917	0.3153	No
	Syracosphaera sp.	-3.6799	3.6368	0.02503	Yes
	Richness	-1.502	28.714	0.144	No
All	Temperature	1.04	51.308	0.3055	No
	DIC	-0.22	67.208	0.8297	No
	pH	-1.2	68.974	0.2328	No
	HCO₃⁻	0.18	64.594	0.8563	No
	CO₃²⁻	-1.4	67.784	0.1665	No
	Ωcalcite	-1.27	67.221	0.2083	No
	Ωaragonite	-1.3	66.954	0.1988	No
	Chlorophyll a	-0.25	68.628	0.807	No

## Sheet: TableS4
Station	Parameters	W	p-value	Significant (p < 0.05)
LBW	Temperature	52	0.5336	No
	Salinity	41	0.8362	No
	Total Alkalinity	40	0.778	No
	pCO2	38	0.6574	No
	CO₃²⁻	41	0.8364	No
	Ωcalcite	43.5	1	No
	Ωaragonite	44.5	1	No
	Phosphate	44	1	No
	Nitrite	48	0.7721	No
	Silicate	50.5	0.6198	No
	Precipitations	21	0.06238	No
	Total coccospheres	38	0.6574	No
	G. oceanica	53	0.492	No
	S. tumularis	8	0.6286	No
LA	Phosphate	75.5	0.4101	No
	Nitrate	134.5	0.05673	No
	Nitrite	70	0.2792	No
	Silicate	137.5	0.04068	Yes
	Chlorophyll a	102	0.7066	No
	Precipitations	60	0.1192	No
	Total coccospheres	47	0.02871	Yes
	E. huxleyi	16	0.001294	Yes
	G. oceanica	111	0.4303	No
	G. ericsonii	18	0.2594	No
	C. rigidus	8	0.01352	Yes
	U. hulburtiana	2	0.03636	Yes
	D. tubifera	10	1	No
	S. tumularis	37.5	0.5992	No
	Shannon index	46	0.02662	Yes
	Richness	46.5	0.02639	Yes
BLA	Salinity	75	0.0493	Yes
	CO₃²⁻	51	0.0325	Yes
	Phosphate	166.5	0.1459	No
	Nitrate	144.5	0.5332	No
	Nitrite	144.5	0.5311	No
	Silicate	170	0.1126	No
	Precipitations	36	0.0005652	Yes
	Total coccospheres	70	0.02994	Yes
	E. huxleyi	28	0.0004205	Yes
	G. oceanica	198	0.006907	Yes
	G. ericsonii	17	0.7922	No
	C. rigidus	16	0.01721	Yes
	U. hulburtiana	19	1	No
	S. tumularis	16	0.4376	No
	Shannon index	93.5	0.2056	No
All	Salinity	445	0.03903	Yes
	Total alkalinity	564	0.4941	No
	pCO2	724	0.2502	No
	Phosphate	705.5	0.3492	No
	Nitrate	731.5	0.2162	No
	Nitrite	553	0.415	No
	Silicate	812	0.03022	Yes
	Precipitations	260	2.596e-05	Yes
	Total coccospheres	465	0.002686	Yes
	E. huxleyi	133	3.916e-10	Yes
	G. oceanica	1028	0.008812	Yes
	G. ericsonii	910.5	0.08949	No
	C. rigidus	574	0.05237	No
	U. hulburtiana	250	1.299e-08	Yes
	S. histrica	720	0.1054	No
	H. carteri	882	0.08307	No
	D. tubifera	716	0.5552	No
	C. corselii	570	0.003812	Yes
	M. elegans	653	0.09719	No
	S. tumularis	771.5	0.9486	No
	Syracosphaera sp.	642	0.06841	No
	Helicosphaera sp.	760	0.8699	No
	U. tenuis	742.5	0.2606	No
	F. profunda	697.5	0.04515	Yes
	Shannon index	506	0.01042	Yes
	Richness	520	0.0145	Yes

## Sheet: Table S5
	Parameters	Total coccospheres	E. huxleyi	G. oceanica	Shannon index	Richness
All	Temperature	0.1	-0.02	0.3*	-0.18	-0.2
	Salinity	-0.03	0.07	-0.27*	0.13	0.15
	DIC	-0.16	-0.13	-0.2	0.01	0.03
	Total Alkalinity	-0.09	0	-0.28*	0.08	0.1
	pHT	0.15	0.21	-0.02	0.13	0.11
	pCO2	-0.17	-0.22	-0.01	-0.12	-0.11
	HCO₃⁻	-0.2	-0.19	-0.16	-0.03	-0.01
	CO₃²⁻	0.15	0.21	-0.05	0.15	0.14
	Ωcalcite	0.16	0.21	-0.02	0.14	0.13
	Phosphate	-0.06	-0.11	-0.01	-0.2	-0.18
	Nitrate	-0.15	-0.07	-0.09	-0.18	-0.17
	Nitrite	0.06	0.03	0.1	0	0.04
	Silicate	0.08	-0.1	0.34**	-0.03	0
	Chlorophyll a	-0.18	-0.16	-0.09	-0.18	-0.17
	Precipitations	0.33**	0.27*	0.25*	-0.05	-0.02
Dry	Temperature	0.29	-0.3	0.46**	-0.09	-0.06
	Salinity	0.2	0.02	0.2	-0.09	-0.09
	DIC	-0.06	-0.04	-0.12	0.05	0.07
	Total Alkalinity	-0.19	-0.28	-0.06	-0.16	-0.13
	pHT	-0.14	-0.13	-0.07	-0.08	-0.06
	pCO2	0.13	0.23	0.03	0.12	0.1
	HCO₃⁻	-0.14	-0.25	-0.03	-0.13	-0.11
	CO₃²⁻	-0.21	-0.3	-0.05	-0.18	-0.15
	Ωcalcite	0.14	0.22	0.02	0.15	0.14
	Phosphate	0.18	0.22	0.06	0.15	0.15
	Nitrate	-0.02	-0.17	-0.1	-0.18	-0.18
	Nitrite	-0.28	-0.08	-0.11	-0.17	-0.17
	Silicate	0.08	0.04	-0.01	0.11	0.13
	Chlorophyll a	0.29	0.2	0.36*	0.21	0.23
	Precipitations	-0.28	-0.31*	-0.19	-0.22	-0.19
Wet	Temperature	0.13	0.23	0.57***	-0.53**	-0.49**
	Salinity	0.01	0.04	0.29	-0.24	-0.27
	DIC	-0.24	-0.25	-0.32	0.04	0.04
	Total Alkalinity	-0.09	-0.1	-0.45**	0.23	0.25
	pHT	-0.11	-0.07	-0.63***	0.3	0.33
	pCO2	0.08	0.07	0.03	0.11	0.11
	HCO₃⁻	-0.11	-0.09	-0.13	-0.11	-0.09
	CO₃²⁻	-0.09	-0.11	-0.38*	0.19	0.21
	Ωcalcite	0.04	0.05	-0.02	0.06	0.04
	Phosphate	0.08	0.08	0.06	0.03	0.01
	Nitrate	-0.07	-0.09	0.14	-0.24	-0.19
	Nitrite	0.08	0.2	-0.13	-0.12	-0.1
	Silicate	0	-0.05	0.36*	-0.1	-0.07
	Chlorophyll a	0.08	0.03	0.19	-0.05	-0.02
	Precipitations	-0.14	-0.15	0.14	-0.21	-0.21

## Sheet: Table S6
Station	Latitude	Longitude	Date	Season	Depth(m)	E. huxleyi (cells/l)	G. oceanica (cells/l)	G. ericsonii (cells/l)	C. rigidus (cells/l)	U. hulburtiana (cells/l)	S. histrica (cells/l)	H. cateri (cells/l)	D. tubifera (cells/l)	C. corselii (cells/l)	M. elegans (cells/l)	S. tumularis (cells/l)	Syracosphaera spp. (cells/l)	Helicosphaera spp. (cells/l)	U. tenuis (cells/l)	F. profunda (cells/l)	Coccospheres (cells/l)
BLA	6.26278	3.36037	2018-12-05	Dry	5	8206	24418	1101	1101	0	0	0	200	300	0	0	0	0	0	0	35326
BLA	6.26278	3.36037	2018-12-05	Dry	50	1799	330	0	300	600	0	0	0	0	0	0	0	0	0	0	3029
BLA	6.26278	3.36037	2019-02-21	Dry	5	0	3462	0	0	0	0	0	0	0	0	0	0	0	0	0	3462
BLA	6.26278	3.36037	2019-02-21	Dry	25	0	1579	0	0	0	0	0	0	0	0	0	0	0	0	0	1579
BLA	6.26278	3.36037	2019-02-21	Dry	50	0	4728	0	0	0	0	0	0	0	0	0	0	0	0	0	4728
BLA	6.26278	3.36037	2019-04-05	Dry	25	183	3182	366	0	0	0	0	92	0	0	0	0	0	0	0	3823
BLA	6.26278	3.36037	2019-04-05	Dry	50	8359	15513	322	161	0	0	0	322	0	0	161	0	0	0	0	24838
BLA	6.26278	3.36037	2020-01-17	Dry	5	2532	6541	0	211	0	0	211	0	0	0	211	0	0	0	0	9706
BLA	6.26278	3.36037	2020-01-17	Dry	25	3558	411	0	137	0	0	0	0	0	0	137	0	0	0	0	4243
BLA	6.26278	3.36037	2020-01-17	Dry	50	563	188	0	0	0	0	188	0	0	0	0	0	0	0	0	939
BLA	6.26278	3.36037	2020-03-06	Dry	5	814	10224	0	588	0	0	90	452	0	0	45	0	0	0	0	12213
BLA	6.26278	3.36037	2020-03-06	Dry	25	1255	14948	0	1146	0	0	55	327	0	55	109	0	0	0	0	17895
BLA	6.26278	3.36037	2021-01-19	Dry	5	1350	7258	338	84	0	0	0	0	0	0	253	0	0	0	0	9283
BLA	6.26278	3.36037	2021-01-19	Dry	25	8805	7752	0	0	287	0	0	0	287	574	574	96	0	0	0	18375
BLA	6.26278	3.36037	2021-01-19	Dry	50	3363	4061	63	127	254	0	63	0	0	317	698	63	0	0	0	9009
BLA	6.26278	3.36037	2021-04-07	Dry	5	2504	15525	0	223	0	0	0	0	0	0	278	0	0	0	0	18530
BLA	6.26278	3.36037	2021-04-07	Dry	50	2337	3506	195	0	0	0	0	0	0	0	0	0	0	0	0	6038
BLA	6.26278	3.36037	2019-09-13	Wet	5	20687	3410	76	530	303	76	0	0	0	0	76	0	0	0	0	25158
BLA	6.26278	3.36037	2019-09-13	Wet	25	5115	2728	0	0	341	0	0	0	0	0	0	0	0	0	0	8184
BLA	6.26278	3.36037	2019-09-13	Wet	50	3367	8891	0	0	259	0	0	0	0	0	0	0	0	0	0	12517
BLA	6.26278	3.36037	2019-10-11	Wet	5	25180	2774	0	1707	213	213	0	0	0	213	0	0	0	0	0	30300
BLA	6.26278	3.36037	2019-10-11	Wet	25	8352	1044	0	261	0	0	0	0	0	0	0	0	0	0	0	9657
BLA	6.26278	3.36037	2019-10-11	Wet	50	14211	2866	0	717	1553	0	0	0	0	0	0	0	0	0	0	19347
BLA	6.26278	3.36037	2019-11-01	Wet	5	27832	2361	0	1349	843	0	0	506	0	0	0	0	0	0	0	32891
BLA	6.26278	3.36037	2019-11-01	Wet	25	13873	1121	0	1121	2663	0	0	0	0	0	0	0	0	0	0	18778
BLA	6.26278	3.36037	2019-11-01	Wet	50	6215	1611	0	614	537	0	0	384	0	0	0	0	0	0	0	9361
BLA	6.26278	3.36037	2020-10-15	Wet	5	7319	322	92	0	138	0	138	46	1059	1703	0	0	46	0	0	10863
BLA	6.26278	3.36037	2020-10-15	Wet	25	18038	417	371	1855	371	0	0	0	93	232	46	139	0	278	0	21840
BLA	6.26278	3.36037	2020-10-15	Wet	50	1938	496	451	0	0	0	0	0	0	0	0	0	0	0	0	2885
BLA	6.26278	3.36037	2020-11-19	Wet	5	16454	729	0	0	61	0	121	61	121	0	6132	243	0	0	0	23922
BLA	6.26278	3.36037	2020-11-19	Wet	25	9126	824	177	236	294	0	0	294	0	1413	17487	353	0	0	0	30204
BLA	6.26278	3.36037	2020-11-19	Wet	50	2966	218	0	0	174	0	0	0	0	87	960	305	0	0	698	5408
LA	6.30861	3.38417	2019-02-21	Dry	5	0	2660	0	0	0	0	0	0	0	0	0	0	0	0	0	2660
LA	6.30861	3.38417	2019-02-21	Dry	25	0	2087	0	0	0	0	0	0	0	0	0	0	0	0	0	2087
LA	6.30861	3.38417	2019-02-21	Dry	35	0	1428	0	0	0	0	0	0	0	0	0	0	0	0	0	1428
LA	6.30861	3.38417	2019-04-05	Dry	5	0	5601	0	0	0	0	0	0	0	0	0	0	0	0	0	5601
LA	6.30861	3.38417	2019-04-05	Dry	25	0	2339	0	0	0	0	0	0	0	0	0	0	0	0	0	2339
LA	6.30861	3.38417	2019-04-05	Dry	35	663	12460	133	0	0	0	0	530	0	0	133	0	0	0	0	13919
LA	6.30861	3.38417	2020-01-17	Dry	25	331	166	0	0	0	0	33	0	0	0	0	0	0	0	0	530
LA	6.30861	3.38417	2020-01-17	Dry	35	1875	2251	0	0	107	0	0	0	0	0	0	0	0	0	0	4233
LA	6.30861	3.38417	2020-03-06	Dry	5	2300	873	6028	159	0	0	1586	159	0	0	159	0	0	0	0	11264
LA	6.30861	3.38417	2020-03-06	Dry	25	10609	3441	11182	0	0	0	0	0	0	0	0	0	0	0	0	25232
LA	6.30861	3.38417	2020-03-06	Dry	35	1744	1628	9126	1104	0	0	0	523	0	0	0	116	0	0	0	14241
LA	6.30861	3.38417	2020-12-22	Dry	25	2716	1289	0	92	92	0	0	0	0	0	1013	0	0	0	0	5202
LA	6.30861	3.38417	2021-01-19	Dry	5	5256	7469	55	55	55	0	0	0	166	277	166	0	0	0	0	13499
LA	6.30861	3.38417	2021-01-19	Dry	25	6762	10676	0	254	0	0	0	0	0	305	305	0	0	0	0	18302
LA	6.30861	3.38417	2021-04-07	Dry	5	4208	18327	3598	339	0	0	68	204	0	0	136	136	0	0	0	27016
LA	6.30861	3.38417	2021-04-07	Dry	25	1254	9855	538	60	0	0	0	0	0	0	119	0	0	0	0	11826
LA	6.30861	3.38417	2021-04-07	Dry	35	1208	4558	55	55	0	0	55	0	0	0	165	0	0	0	0	6096
LA	6.30861	3.38417	2019-09-13	Wet	5	15531	7675	60	181	121	0	0	0	0	0	60	60	0	0	0	23688
LA	6.30861	3.38417	2019-09-13	Wet	25	6683	4280	0	375	375	0	0	300	0	0	0	0	0	0	75	12088
LA	6.30861	3.38417	2019-09-13	Wet	35	2380	793	0	397	0	0	0	0	0	0	0	0	0	0	0	3570
LA	6.30861	3.38417	2019-10-11	Wet	5	25725	9660	0	915	203	0	0	0	203	0	0	0	0	0	0	36706
LA	6.30861	3.38417	2019-10-11	Wet	25	17151	8576	0	2246	3675	0	0	3879	306	0	102	0	0	0	0	35935
LA	6.30861	3.38417	2019-11-01	Wet	5	2299	6515	0	383	671	0	0	0	192	0	96	0	0	0	0	10156
LA	6.30861	3.38417	2019-11-01	Wet	25	9184	2482	0	745	1158	0	0	0	0	0	165	0	0	0	0	13734
LA	6.30861	3.38417	2019-11-01	Wet	35	42614	1447	0	1578	263	0	0	1315	0	0	263	0	0	0	0	47480
LA	6.30861	3.38417	2020-10-15	Wet	5	12137	80	80	0	0	0	0	0	80	80	80	0	0	0	0	12537
LA	6.30861	3.38417	2020-11-19	Wet	5	6450	362	60	0	60	0	0	60	301	301	1628	181	0	0	0	9403
LA	6.30861	3.38417	2020-11-19	Wet	25	12271	777	0	0	1087	0	0	78	388	0	17707	699	0	0	544	33551
LBW	6.36222	3.3975	2019-02-21	Dry	5	0	2334	0	0	0	0	0	0	0	0	0	0	0	0	0	2334
LBW	6.36222	3.3975	2019-02-21	Dry	15	438	11289	110	219	0	0	0	0	0	0	0	0	0	0	0	12056
LBW	6.36222	3.3975	2019-04-05	Dry	5	328	6889	0	328	0	0	0	0	0	0	0	0	0	0	0	7545
LBW	6.36222	3.3975	2019-04-05	Dry	15	960	38038	0	480	0	0	120	360	0	0	0	0	0	0	0	39958
LBW	6.36222	3.3975	2020-01-17	Dry	5	147	110	0	6	0	0	0	0	0	0	0	0	0	0	0	263
LBW	6.36222	3.3975	2020-01-17	Dry	15	1410	1218	0	0	0	0	0	0	0	0	0	0	0	0	0	2628
LBW	6.36222	3.3975	2020-03-06	Dry	5	1249	2443	11998	163	0	0	54	217	0	0	0	217	0	0	0	16341
LBW	6.36222	3.3975	2020-03-06	Dry	15	1141	1337	7710	393	0	0	0	118	0	0	118	0	197	0	0	11014
LBW	6.36222	3.3975	2020-12-22	Dry	5	1756	1646	0	146	0	0	0	0	0	0	219	0	0	0	0	3767
LBW	6.36222	3.3975	2021-01-19	Dry	5	2061	9039	0	106	53	0	0	0	0	0	317	0	0	0	0	11576
LBW	6.36222	3.3975	2021-04-07	Dry	5	613	17288	858	123	0	0	0	0	0	0	123	0	0	0	0	19005
LBW	6.36222	3.3975	2019-09-13	Wet	5	10109	10291	91	182	0	0	0	0	0	0	91	0	0	0	0	20764
LBW	6.36222	3.3975	2019-09-13	Wet	15	1918	1598	0	0	0	0	0	0	0	0	0	0	0	0	0	3516
LBW	6.36222	3.3975	2019-10-11	Wet	5	13296	3536	0	283	1132	0	0	0	0	0	0	0	0	0	0	18247
LBW	6.36222	3.3975	2019-10-11	Wet	15	7571	6826	0	0	248	0	0	0	0	0	0	0	0	0	0	14645
LBW	6.36222	3.3975	2019-11-01	Wet	5	2547	1873	0	150	0	0	0	0	0	0	0	0	0	0	0	4570
LBW	6.36222	3.3975	2019-11-01	Wet	15	3310	2648	0	165	276	0	0	55	55	0	0	0	0	0	0	6509
LBW	6.36222	3.3975	2020-10-15	Wet	5	5524	665	0	0	0	0	0	51	0	51	102	51	0	0	0	6444
LBW	6.36222	3.3975	2020-11-19	Wet	15	10182	440	0	55	275	0	55	0	275	165	1816	55	0	0	0	13318

## Sheet: Table S7
Station	Latitude	Longitude	Date	Season	Depth (m)	Temperature (ºC)	Salinity	DIC (µmol/kg)	Total Alkalinity (µmol/kg)	pH	pCO2 (µatm)	HCO₃⁻ (µmol/kg)	CO₃²⁻ (µmol/kg)	Ωcalcite	Ωaragonite	Phosphate (µmol/kg)	Nitrate (µmol/kg)	Nitrite (µmol/kg)	Silicate (µmol/kg)	Chlorophyll a (mg/m3)	Precipitations (mm)
BLA	6.26278	3.36037	2018-12-05	Dry	5	29.4	31.6	1920.6	2204.2	8.002	439.4	1708.9	200.4	5.01	3.32	5.16	43.706	0.011	2.295	8.3	9.78098
BLA	6.26278	3.36037	2018-12-05	Dry	50	25.2	39.6	2156.6	2372.6	7.82	735.6	1978.2	158.2	3.63	2.41	2.316	17.902	0.008	1.785	7.1	9.78098
BLA	6.26278	3.36037	2019-02-21	Dry	5	29.9	31	1825.3	2117.2	8.021	400.1	1616.5	198.5	5	3.31	10.951	43.545	0.005	2.83	5.8	88.9489
BLA	6.26278	3.36037	2019-02-21	Dry	25	29.8	30.8	1981.6	2233.1	7.925	552.4	1792.1	175.3	4.4	2.92	13.478	54.189	0.019	2.83	5.8	88.9489
BLA	6.26278	3.36037	2019-02-21	Dry	50	29	33	2132.7	2254.5	7.615	1240.2	2002	98.5	2.41	1.61	11.582	21.772	0.005	3.33	5.4	88.9489
BLA	6.26278	3.36037	2019-04-05	Dry	25	29	32.8	2016.6	2200	7.766	818.4	1866.1	129.2	3.18	2.12	15.584	33.062	0.005	5.328	2.1	145.211
BLA	6.26278	3.36037	2019-04-05	Dry	50	29.6	33.6	1973.2	2231	7.921	544.8	1776.3	183	4.48	2.99	4.738	45.974	0.003	6.16	8.2	145.211
BLA	6.26278	3.36037	2019-09-13	Dry	5	27.1	32.1	NA	NA	NA	NA	NA	NA	NA	NA	0.0043	105.975	2.826	1.675	19.8	108.875
BLA	6.26278	3.36037	2019-09-13	Dry	25	27.4	32	NA	NA	NA	NA	NA	NA	NA	NA	0.0063	99.911	2.826	10.23	21.1	108.875
BLA	6.26278	3.36037	2019-10-11	Wet	5	27.5	33.5	2022.7	2299.2	7.986	472.4	1809.3	200.7	4.89	3.24	0.0044	49.964	2.152	2.845	12.4	179.162
BLA	6.26278	3.36037	2019-10-11	Wet	25	28.2	33.2	1979.7	2376.7	8.159	298.2	1688.4	283.4	6.96	4.62	0.0063	74.946	2.152	6.201	11.8	179.162
BLA	6.26278	3.36037	2019-10-11	Wet	50	28.7	34	NA	NA	NA	NA	NA	NA	NA	NA	0.0052	106.12	2.826	3.855	20.1	179.162
BLA	6.26278	3.36037	2019-11-01	Wet	5	27.3	32.8	1961.9	2254.4	8.033	409.2	1740.9	209.9	5.16	3.41	0.3159	17.741	0.0001	2.663	12.3	89.1311
BLA	6.26278	3.36037	2019-11-01	Wet	25	27	33.8	2022.7	2333	8.041	409.4	1788.6	223	5.42	3.59	0.3159	17.902	0.0001	3.995	15.1	89.1311
BLA	6.26278	3.36037	2019-11-01	Wet	50	26.8	35.4	2060.8	2341.2	7.971	492.7	1845.6	201.9	4.83	3.2	0.7371	5.806	0.0004	0.999	6.6	89.1311
BLA	6.26278	3.36037	2020-01-17	Wet	5	30.1	30.7	1840.2	2128.1	8.02	405.7	1630.2	199.6	5.04	3.34	7.265	33.868	0.02	6.826	6.2	247.829
BLA	6.26278	3.36037	2020-01-17	Wet	25	30	31.4	1892	2169.3	7.983	455	1687.8	192.6	4.82	3.2	8.529	34.191	0.004	5.161	5.1	247.829
BLA	6.26278	3.36037	2020-01-17	Wet	50	30.6	33.6	NA	NA	NA	NA	NA	NA	NA	NA	0.211	39.513	0.002	0.999	18.3	247.829
BLA	6.26278	3.36037	2020-03-06	Wet	5	30.5	33.5	1975.7	2267.4	7.973	479.9	1754	209.7	5.16	3.45	0.421	31.993	0.001	1.498	11.8	538.452
BLA	6.26278	3.36037	2020-03-06	Wet	25	24	34	2130	2364.4	7.942	546.8	1940.1	173.9	4.18	2.75	0.526	38.888	0.001	1.997	11.1	538.452
BLA	6.26278	3.36037	2020-03-06	Wet	50	31.4	33.4	1930.5	2260.1	8.027	410.9	1686.1	234.3	5.8	3.89	0.232	44.351	0.003	2.497	19.1	538.452
BLA	6.26278	3.36037	2020-11-19	Dry	5	27.1	31.8	2125.1	2364.5	7.935	570	1929.6	179.9	4.46	2.94	0.4212	17.095	0.0001	15.812	13.6	10.0837
BLA	6.26278	3.36037	2020-11-19	Dry	25	27	31.8	2003.8	2377.3	8.16	303.8	1726.4	269	6.66	4.39	0.5792	21.45	0.0001	9.154	12.2	10.0837
BLA	6.26278	3.36037	2020-11-19	Dry	50	28.8	29.8	1980.1	2119.4	7.747	859.3	1844.9	112.4	2.85	1.87	0.4212	32.094	0.0006	5.992	9.9	10.0837
BLA	6.26278	3.36037	2020-12-22	Dry	5	27.9	33.9	2095.6	2336.8	7.904	600.3	1901	178.6	4.35	2.89	0.5791	38.543	0.0004	6.99	11.2	116.038
BLA	6.26278	3.36037	2020-12-22	Dry	50	28.9	29.8	1927	2026.7	7.645	1067.8	1811.2	87.6	2.22	1.46	0.4317	25.643	0.0005	7.656	6.8	116.038
BLA	6.26278	3.36037	2021-01-19	Wet	5	31.2	33.5	1943.7	2258.1	8.003	438.3	1708.7	224.2	5.52	3.7	0.316	36.774	0.001	1.664	16.8	97.0876
BLA	6.26278	3.36037	2021-01-19	Wet	25	30.2	33.1	1968.3	2241	7.953	503.7	1758.7	196.9	4.85	3.24	0.337	36.935	0.001	4.494	12.3	97.0876
BLA	6.26278	3.36037	2021-01-19	Wet	50	31.4	33.4	1938.9	2203.3	7.923	537.4	1735.8	189.9	4.7	3.15	0.842	42.582	0.001	3.995	8.7	97.0876
BLA	6.26278	3.36037	2021-04-07	Dry	5	30.5	34	1950.8	2277.7	8.024	415.7	1708.4	232.1	5.69	3.81	0.632	57.576	0.001	1.332	11.4	0.476345
BLA	6.26278	3.36037	2021-04-07	Dry	25	27.8	31.7	1954.4	2223.8	8.005	442.3	1747.2	195.3	4.86	3.21	0.0059	81.929	1.435	8.047	16.2	0.476345
BLA	6.26278	3.36037	2021-04-07	Dry	50	27.3	33.3	2027.9	2367.1	8.085	368.4	1773.7	244.3	5.97	3.95	0.0042	87.428	1.413	1.672	20.7	0.476345
LA	6.30861	3.38417	2019-02-21	Dry	5	28	33.4	2176.2	2356.2	7.782	843.3	2012.2	141.7	3.46	2.3	0.4212	32.901	0.0006	5.825	19.1	100.633
LA	6.30861	3.38417	2019-02-21	Dry	25	28.3	34.7	2175.5	2410.2	7.866	680.8	1981.1	176.7	4.27	2.84	0.3475	32.578	0.0003	1.831	13.2	100.633
LA	6.30861	3.38417	2019-02-21	Dry	35	27.8	28.6	1940.7	2080	7.78	781.8	1808.1	111.2	2.84	1.85	0.9371	33.546	0.0003	9.986	19.8	100.633
LA	6.30861	3.38417	2019-04-05	Dry	5	27.8	32.5	2169.8	2463.8	7.999	495	1938.3	218.2	5.38	3.56	1.0529	32.094	0.0004	4.993	18.2	156.327
LA	6.30861	3.38417	2019-04-05	Dry	25	28.4	32.4	1974.9	2207.9	7.92	550.8	1789.4	171	4.23	2.8	0.0842	3.709	0.2356	5.992	9.6	156.327
LA	6.30861	3.38417	2019-04-05	Dry	35	26.4	34	2087.6	2297.8	7.869	647.5	1912	157.8	3.83	2.53	0.0948	0.484	0.2878	1.831	12.4	156.327
LA	6.30861	3.38417	2019-09-13	Dry	5	30.1	32.6	1877.7	2093.4	7.87	594.3	1707.5	155.2	3.85	2.57	2.0006	16.128	0.0966	4.161	9	93.1749
LA	6.30861	3.38417	2019-09-13	Dry	25	30.2	32.6	1884.1	2167.9	7.989	442.3	1672.1	200.8	4.98	3.32	1.6847	10.967	0.0978	4.492	5.4	93.1749
LA	6.30861	3.38417	2019-09-13	Dry	35	27.7	31.7	2030.9	2216	7.82	725.5	1874.8	136.5	3.39	2.24	7.476	17.902	0.047	5.493	2.4	93.1749
LA	6.30861	3.38417	2019-10-11	Wet	5	26.8	34	2124.8	2359.1	7.884	636.8	1939.6	167.9	4.07	2.7	9.792	21.289	0.061	2.164	2.17	171.943
LA	6.30861	3.38417	2019-11-01	Wet	5	26.7	35.9	2131.4	2350	7.835	712.9	1954.6	157.5	3.76	2.5	8.424	20.321	0.045	3.329	2.41	81.1952
LA	6.30861	3.38417	2019-11-01	Wet	25	25.3	34.8	2245.5	2424.3	7.773	872.6	2085.7	135.2	3.25	2.14	9.371	22.74	0.094	6.325	2.43	81.1952
LA	6.30861	3.38417	2020-01-17	Wet	5	22.9	34.6	2179.9	2318.7	7.744	898.1	2039.9	113.1	2.7	1.77	1.6847	17.579	7.008	1.664	6.8	245.275
LA	6.30861	3.38417	2020-01-17	Wet	25	28.2	33.5	2040.6	2190.2	7.728	903.2	1897.9	118.9	2.92	1.94	0.1053	4.193	5.0787	6.491	13.1	245.275
LA	6.30861	3.38417	2020-01-17	Wet	35	26.2	35.6	2144.3	2346.8	7.831	724.5	1971	153.5	3.67	2.43	0.0948	5.806	2.9016	3.162	17.6	245.275
LA	6.30861	3.38417	2020-03-06	Wet	5	23.7	35.5	2066.5	2289.9	7.915	563.3	1887.5	162.7	3.87	2.55	1.3688	16.612	7.2558	5.16	6.6	488.885
LA	6.30861	3.38417	2020-03-06	Wet	25	28.6	32.7	1931.3	2221.7	8.017	420.8	1712.4	207.8	5.14	3.41	0.0842	8.709	0.237	5.659	20.3	488.885
LA	6.36222	3.3975	2020-10-15	Dry	25	28.5	30.4	1869.2	2118.3	7.989	444.9	1677.8	179.5	4.52	2.98	0.737	22.418	0.446	8.156	2.8	18.602
LA	6.30861	3.38417	2020-11-19	Dry	5	25.5	34.3	2136.4	2360.7	7.894	620.1	1952.5	166.4	4	2.64	0.316	29.675	0.61	71.569	4.7	10.2696
LA	6.30861	3.38417	2020-11-19	Dry	25	28.5	30.8	1867.2	2114.6	7.98	453.8	1677.8	177.4	4.45	2.94	0.232	20.321	0.422	36.617	4	10.2696
LA	6.30861	3.38417	2020-12-22	Dry	5	27.1	35	1970.3	2195.1	7.889	580.1	1792.2	162.5	3.91	2.59	0.253	27.256	0.352	14.98	5.4	106.223
LA	6.30861	3.38417	2020-12-22	Dry	25	28.4	31.9	2058.7	2317.7	7.959	522.2	1853.4	191.5	4.76	3.15	0.232	96.928	0.235	8.488	18	106.223
LA	6.30861	3.38417	2020-12-22	Dry	35	28.2	32.9	1983.6	2251.1	7.974	480.1	1777.1	193.8	4.77	3.16	0.2	23.063	0.117	5.326	5	106.223
LA	6.30861	3.38417	2021-01-19	Wet	5	30.2	32.9	1818.8	2116.2	8.02	393.9	1600.9	207.9	5.15	3.44	0.631	14.3541	0.0942	1.165	8.8	91.222
LA	6.30861	3.38417	2021-01-19	Wet	25	30	33.4	1881.3	2194.6	8.029	396.1	1651.1	220.3	5.41	3.62	0.9898	15.8051	0.094	0.688	8.1	91.222
LA	6.30861	3.38417	2021-01-19	Wet	35	24	35.1	2118.7	2317.3	7.862	658.7	1950.5	149.2	3.56	2.34	0.7371	22.095	0.178	1.661	10.6	91.222
LA	6.30861	3.38417	2021-04-07	Dry	25	27	35.5	1945.2	2226.7	7.986	448.7	1735	198.1	4.75	3.15	1.1158	62.898	0.0901	2.996	15.8	0.457461
LA	6.30861	3.38417	2021-04-07	Dry	35	30.4	34	2082.7	2312.5	7.845	693.4	1895	170.4	4.16	2.79	1.8953	10.483	0.095	1.664	5.9	0.457461
LBW	6.36222	3.3975	2019-02-21	Dry	5	29.3	28	1720	1931.4	7.962	448	1556.9	151.2	3.9	2.55	1.053	16.773	0.704	20.472	13.9	100.633
LBW	6.36222	3.3975	2019-02-21	Dry	15	28.3	34.2	2045.8	2308.7	7.937	538.9	1840.8	190.8	4.64	3.09	1.158	29.352	0.939	8.156	21.4	100.633
LBW	6.36222	3.3975	2019-04-05	Dry	5	31.4	34.8	2201.8	2375.7	7.831	733.3	2045.4	133.9	3.19	2.08	2.738	31.449	1.174	6.158	9.7	156.327
LBW	6.36222	3.3975	2019-04-05	Dry	15	29.5	28.3	1743.2	1966.8	7.966	449.2	1574.9	156.5	4.02	2.64	5.37	17.902	0.798	20.306	3.3	156.327
LBW	6.36222	3.3975	2019-09-13	Dry	5	28.9	34.5	2016.8	2316.2	7.988	467.1	1790.1	214.6	5.21	3.47	0.842	19.998	0.069	3.162	19.1	93.1749
LBW	6.36222	3.3975	2019-09-13	Dry	15	28.8	35.5	2038	2329.3	7.961	502.3	1816.4	208.7	5.01	3.35	0.948	20.16	0.144	4.494	18.2	93.1749
LBW	6.36222	3.3975	2019-10-11	Wet	5	29.5	34.6	1987.3	2276.3	7.967	487.2	1768.6	206.3	5.02	3.36	1.158	23.385	0.071	3.495	17	171.943
LBW	6.36222	3.3975	2019-11-01	Wet	15	22.5	34.3	2170.8	2359.2	7.868	665.7	2006.3	144.3	3.47	2.27	0.421	9.838	0.061	7.323	13.37	81.1952
LBW	6.36222	3.3975	2020-01-17	Wet	5	29.4	34.6	2004.1	2297.2	7.971	485.2	1782.3	209.4	5.09	3.4	1.369	23.385	1.033	5.493	15.1	245.275
LBW	6.36222	3.3975	2020-01-17	Wet	15	28.3	34.9	2072.2	2327.5	7.912	579	1871	186	4.49	2.99	1.264	24.03	1.221	5.493	17	245.275
LBW	6.36222	3.3975	2020-03-06	Wet	5	29.3	28.5	1764.4	1970.2	7.936	488.8	1603.1	148.4	3.81	2.5	1.264	14.031	0.775	19.307	9.1	488.885
LBW	6.36222	3.3975	2020-03-06	Wet	15	29.5	31.3	1880	2110.8	7.925	523.1	1700.2	166.2	4.16	2.76	1.579	23.385	1.221	12.317	12.8	488.885
LBW	6.36222	3.3975	2020-10-15	Dry	5	24.2	33	1966.6	2257.5	8.071	367.6	1748.3	207.6	5.04	3.3	0.116	26.933	1.174	9.487	20.62	18.602
LBW	6.36222	3.3975	2020-11-19	Dry	5	29.5	33.7	1932.9	2222.3	7.988	450.3	1715.2	206.1	5.05	3.37	0.211	9.838	0.469	5.825	15.73	10.2696
LBW	6.36222	3.3975	2020-12-22	Dry	5	30.1	33.6	1923.5	2214.1	7.985	453.7	1705.2	206.9	5.09	3.4	0.221	15.483	1.174	5.825	16.05	106.223
LBW	6.36222	3.3975	2021-01-19	Wet	5	26	35.1	2013.4	2317.8	8.032	414.3	1785.6	216.4	5.21	3.45	0.842	15.483	0.072	3.995	15.4	91.222
LBW	6.36222	3.3975	2021-01-19	Wet	15	26.5	34.5	2016.5	2317.6	8.026	422	1789.8	215.2	5.2	3.44	0.737	26.953	0.076	2.497	20.8	91.222
LBW	6.36222	3.3975	2021-04-07	Dry	5	24	35.9	2129.4	2355.9	7.902	598.2	1946	166.1	3.94	2.59	1.895	36.287	0.21	4.66	16.6	0.457461
LBW	6.36222	3.3975	2021-04-07	Dry	15	29	35.1	2001	2303.3	7.985	466.6	1774.4	214.6	5.2	3.47	2.001	28.224	0.074	2.497	11.4	0.457461

## Sheet: Table S8
Oceanographic basin	Standing stocks (cells/L)	Standard deviation
Mediterranean Sea	54505.2	74910.7
North Atlantic Ocean	64404.4	211207
North Sea	43128.3	81988.9
Gulf of Guinea	13035	10013.3
Arabian Sea	8102.04	6302.54
North Pacific Ocean	46125.1	143307
South Pacific Ocean	21288.4	57458.4
Norwegian Sea	6282.82	9322.6
Barents Sea	29793.9	165131
South Atlantic Ocean	16.525	17.8852
White Sea	92208.2	377976
Japan Sea	605.875	641.635
